# Supplementary material
Source: publisher site journal article supplement (https://www.dovepress.com/article/411094)
Supplement: Supplementary file 1 [file get_supplementary_file.php]

**Supplementary material 1.** Baseline characteristics of subjects included in the analysis.

| **Multimodal imaging** | **Exudative**  **Eyes** | **Non-exudative**  **Eyes** |
| --- | --- | --- |
| number of leakage points  (Fluorescein angiography) | 3.4 ± 0.7 | 0.0 ± 0.0 |
| RPE area alteration <2 DA, n (%)  (Fundus autofluorescence) | 7 (41%) | 4 (23%) |
| RPE area alteration >2 DA, n (%)  (Fundus autofluorescence) | 10 (59%) | 0 (0%) |
| IS/OS integrity intact, n (%)  (structural OCT) | 12 (70%) | 17 (100%) |
| ELM integrity intact, n (%)  (structural OCT) | 14 (82%) | 17 (100%) |
| Macular neovascularization, n (%)  (OCT angiography) | 0 (0%) | 0 (0%) |
| RPE retinal pigment epithelium; DA disc area; ELM, external limiting membrane; | | |

|  | **6 months** | **12 months** | | **48 months** | |
| --- | --- | --- | --- | --- | --- |
| **BCVA (logMAR)** | 0.28 ± 0.13 | 0.22± 0.11  P=0.044a | | 0.21± 0.08  P=0.049a | |
|  |  |  | | P=1.023b | |
| **SRF (μm)** | 25.6 ± 44.1 | 0.0± 0.0  P=0.021a | | 0.0± 0.0  P=0.022a | |
|  |  |  | | P>0.05b | |
| **SFCT (μm)** | 547 ± 188.9 | 520.4 ± 170.6  P=0.029a | | 507 ± 164.6  P=0.023a | |
|  |  |  | | P=0.528b | |
| Data are presented as Mean ± SD. **a** comparison versus “6 months”; **b** comparison versus “12 months”. *BCVA best-corrected visual acuity*  *SRF subretinal fluid SFCT sub-foveal choroidal thickness* | | | | | |
|  |  |  |  | |

**Supplemental material 2. Functional and anatomical (OCT) analysis in cCSC affected eyes. Data and Comparisons**

**Supplemental material 3. Functional and anatomical (OCT and OCTA) analysis in cCSC fellow eyes. Data and Comparisons**

|  | **6 months** | **12 months** | | **48 months** | |
| --- | --- | --- | --- | --- | --- |
| **BCVA (logMAR)** | 0.21 ± 0.14 | 0.20± 0.11  P=1.046a | | 0.20± 0.10  P=1.129a | |
|  |  |  | | P=1.212b | |
| **CC FD (%)** | 26.8 ± 1.61 | 26.6 ± 1.42  P=0.071a | | 26.4 ± 1.44  P=0.082a | |
|  |  |  | | P=0.135b | |
| **SFCT (μm)** | 533 ± 203.2 | 506 ± 184.2  P=0.036a | | 491.3 ± 179.5  P=0.031a | |
|  |  |  | | P=0.578b | |
| Data are presented as Mean ± SD.**a** comparison versus “6 months”; **b** comparison versus “12 months”. *BCVA best-corrected visual acuity*  *CC choriocapillaris flow deficits SFCT sub-foveal choroidal thickness* | | | | | |
|  |  |  |  | |
